# Supplementary material for: Morphological and structural differences between glucose, cellulose and lignocellulosic biomass derived hydrothermal carbons
Source: Royal Society of Chemistry journal article supplement (doi:10.1039/c1gc15742f), 2011-01-01
Supplement: c1gc15742f.pdf [file c1gc15742f.pdf]

## Supporting Material

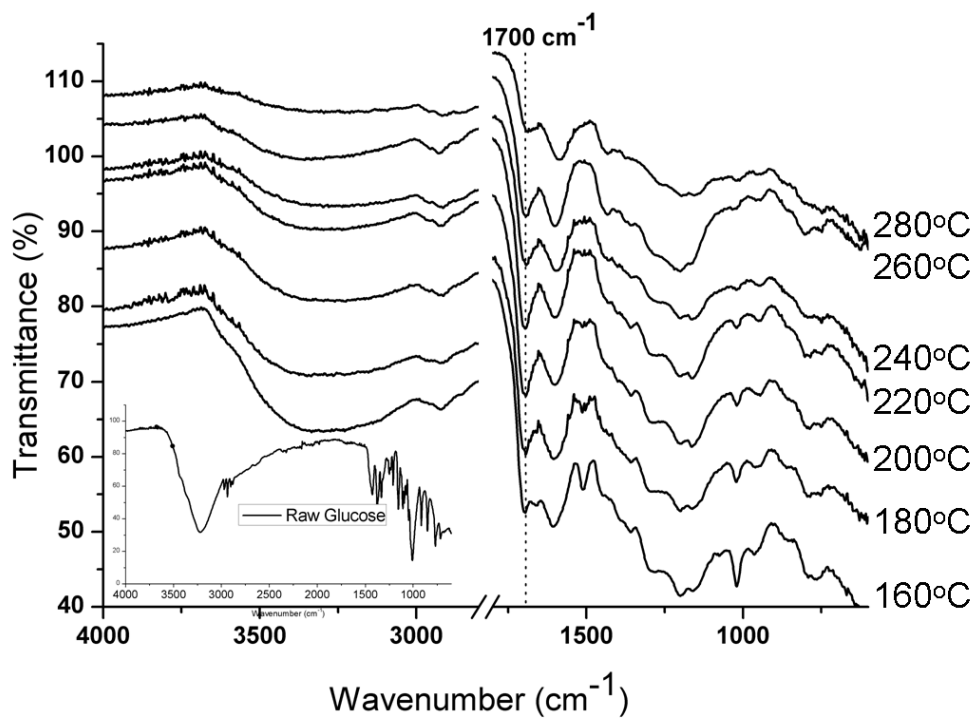

**Figure 1:** FTIR spectra of hydrothermal carbon obtained from glucose at different temperatures.

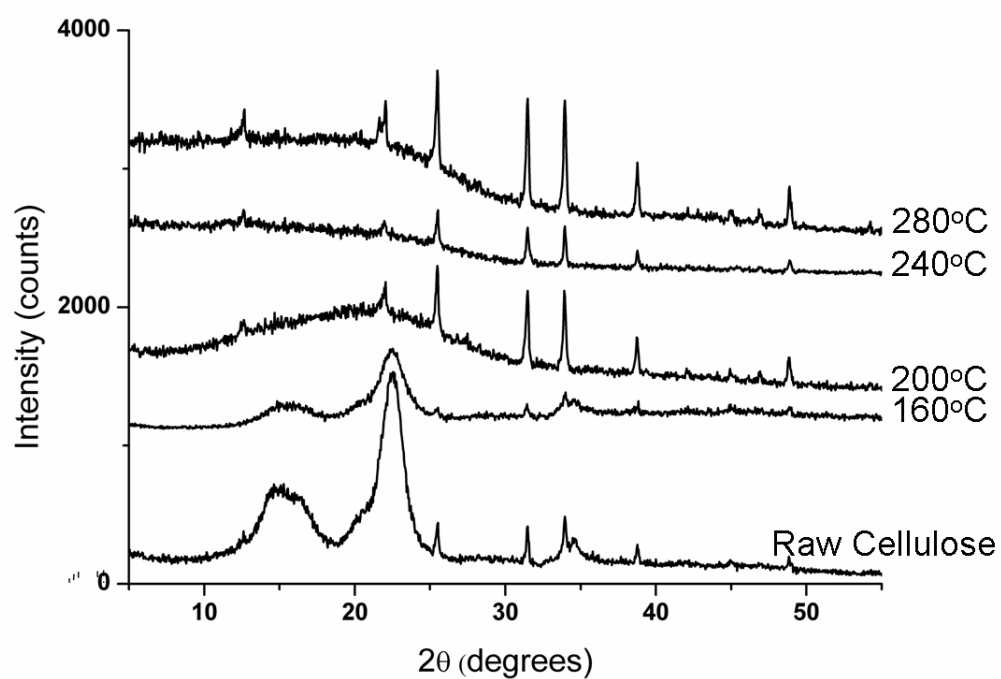

**Figure 2:** XRD profiles of hydrothermal carbon obtained from cellulose at different temperatures.
